# Supplementary material for: Changes in Metal-Chelating Metabolites Induced by Drought and a Root Microbiome in Wheat
Source: MDPI journal article supplement (doi:10.3390/plants12061209), 2023-03-07
Supplement: s1 [file s1]

## Supplemental Information

**Supplemental Table S1.** Growth parameters of plants grown with water or drought – stress, with and without *PcO6* inoculation.

|                                      | No inoculation   |                    | <i>PcO6</i> inoculation |                    |
|--------------------------------------|------------------|--------------------|-------------------------|--------------------|
|                                      | Water<br>(n = 9) | Drought<br>(n = 9) | Water<br>(n = 9)        | Drought<br>(n = 9) |
| Shoot length (cm)                    | 13.2 ± 0.6       | 10.9 ± 0.7         | 13.9 ± 0.3              | 11.8 ± 0.4         |
| Root length (cm)                     | 8.7 ± 0.5        | 7.6 ± 0.6          | 7.9 ± 0.6               | 7.4 ± 0.5          |
| Shoot water content (g/g dry weight) | 5.96 ± 0.34      | 2.46 ± 0.21        | 6.18 ± 0.48             | 2.88 ± 0.53        |
| Shoot dry mass (mg)                  | 221 ± 11         | 153 ± 14           | 222 ± 14                | 174 ± 20           |

**Supplemental Table S2.** Shoot metabolites with statistical analyses.

| <b>Shoot amino acids with main effects only</b> |                |               |             |             |
|-------------------------------------------------|----------------|---------------|-------------|-------------|
|                                                 | W              | D             | I, W        | I, D        |
| asparagine mg/g                                 | 37.4 ± 2.6 B   | 50.4 ± 4.1 A  | 43.7 ± 3.2  |             |
| aspartic acid mg/g                              | 8.80 ± 0.70 B  | 11.6 ± 0.88 A | 10.2 ± 0.72 |             |
| proline mg/g                                    | 0.181 ± 0.01 B | 9.57 ± 1.9 A  | 4.88 ± 1.85 |             |
| DMA µg/g                                        | 20.7 ± 1.1 B   | 24.8 ± 1.9 A  | 22.7 ± 1.3  |             |
| leucine µg/g                                    | 282 ± 36 B     | 355 ± 82 A    | 284 ± 36 B  | 354 ± 82 A  |
| methionine µg/g                                 | 43.5 ± 9.5 B   | 73.5 ± 19 A   | 69.5 ± 20 A | 47.5 ± 11 B |
| phenylalanine µg/g                              | 667 ± 83 B     | 1897 ± 257 A  | 1282 ± 247  |             |
| tyrosine µg/g                                   | 302 ± 43 B     | 996 ± 104 A   | 649 ± 132   |             |

| <b>Shoot amino acids and phenolic acid with interactions</b> |                  |                    |                        |                    |
|--------------------------------------------------------------|------------------|--------------------|------------------------|--------------------|
|                                                              | No inoculation   |                    | <i>PcO6</i> inoculated |                    |
|                                                              | Water<br>(n = 9) | Drought<br>(n = 9) | Water<br>(n = 9)       | Drought<br>(n = 9) |
| ferulic µg/g                                                 | 14.3 ± 2.0 BC    | 39.7 ± 9.6 A       | 24.4 ± 5.5 C           | 29.2 ± 5.2 AB      |
| glutamate µg/g                                               | 704 ± 99 A       | 122 ± 40 C         | 434 ± 96 B             | 283 ± 115 BC       |
| isoleucine µg/g                                              | 552 ± 89 B       | 505 ± 87 B         | 540 ± 55 AB            | 749 ± 151 A        |
| serine mg/g                                                  | 5.43 ± 0.53 A    | 2.75 ± 0.31 C      | 4.92 ± 0.27 A          | 3.97 ± 1.24 B      |

| <b>Shoot organic acids with main effects only</b> |             |             |                |             |
|---------------------------------------------------|-------------|-------------|----------------|-------------|
|                                                   | Water       | Drought     | No <i>PcO6</i> | <i>PcO6</i> |
| gluconate µg/g                                    | 220 ± 65 A  | 78.9 ± 18 B | 150 ± 40       |             |
| acetate µg/g                                      | 412 ± 41    |             | 337 ± 39 B     | 486 ± 56 A  |
| formate µg/g                                      | 443 ± 51 A  | 358 ± 44 B  | 343 ± 34 B     | 458 ± 52 A  |
| malate µg/g                                       | 2150 ± 1240 |             |                |             |
| citrate µg/g                                      | 122 ± 32    |             |                |             |
| lactate µg/g                                      | <MDL        |             |                |             |
| propionate µg/g                                   | <MDL        |             |                |             |
| butyrate µg/g                                     | <MDL        |             | 66.4 ± 86 A    | 49.4 ± 16 B |

Averages with  $\pm$  95% confidence intervals are shown in Table S2 for amino acids and organic acids in shoot extracts based on g dry weight of shoots. Different letters are statistically different by Tukey HSD tests. < MDL is less than the method detection limit.

**Supplemental Table S3.** Chemical properties of the rhizosphere solutions and shoot extracts for plants grown with water or drought and with and without *PcO6* inoculation. Values are average  $\pm$  95% confidence interval.

| <i>Rhizosphere solutions</i>            |                   |                    |                         |                    |
|-----------------------------------------|-------------------|--------------------|-------------------------|--------------------|
|                                         | No inoculation    |                    | <i>PcO6</i> inoculation |                    |
|                                         | Water<br>(n = 9)  | Drought<br>(n = 9) | Water<br>(n = 9)        | Drought<br>(n = 9) |
| pH                                      | 7.19 $\pm$ 0.11   | 6.43 $\pm$ 0.14    | 7.25 $\pm$ 0.12         | 6.65 $\pm$ 0.14    |
| EC ( $\mu$ S/cm)                        | 278 $\pm$ 15      | 493 $\pm$ 31       | 265 $\pm$ 31            | 456 $\pm$ 61       |
| DOC (mg C per plant)                    | 0.33 $\pm$ 0.0.10 | 0.32 $\pm$ 0.03    | 0.19 $\pm$ 0.04         | 0.23 $\pm$ 0.05    |
| Cl ( $\mu$ g per plant)                 | 2.03 $\pm$ 0.34   | 3.33 $\pm$ 0.43    | 1.77 $\pm$ 0.39         | 2.66 $\pm$ 0.30    |
| NO <sub>3</sub> -N ( $\mu$ g per plant) | 28.0 $\pm$ 6.1    | 55.4 $\pm$ 14      | 20.9 $\pm$ 4.6          | 55.5 $\pm$ 10      |
| SO <sub>4</sub> ( $\mu$ g per plant)    | 1.32 $\pm$ 0.54   | 2.35 $\pm$ 0.49    | 1.26 $\pm$ 0.32         | 1.96 $\pm$ 0.22    |
| <i>Shoot extracts</i>                   |                   |                    |                         |                    |
|                                         | No inoculation    |                    | <i>PcO6</i> inoculation |                    |
| $\mu$ g/g                               | Water<br>(n = 9)  | Drought<br>(n = 9) | Water<br>(n = 9)        | Drought<br>(n = 9) |

|          |            |            |            |            |
|----------|------------|------------|------------|------------|
| Chloride | 2380 ± 280 | 2430 ± 220 | 2340 ± 290 | 2440 ± 290 |
| Nitrate  | 4120 ± 520 | 2490 ± 150 | 4040 ± 580 | 2650 ± 250 |

**Supplemental Table S4.** Rhizosphere solution metabolites with statistical analyses.

| <b>Rhizosphere solution organic acids with main effects only</b> |              |                |                |              |
|------------------------------------------------------------------|--------------|----------------|----------------|--------------|
| µg per plant                                                     | Water        | Drought        | No <i>PcO6</i> | <i>PcO6</i>  |
| Gluconate                                                        | 19.6±4.2     |                | 25.9±7.4 A     | 13.8±2.4 B   |
| Oxalate                                                          | 0.85±0.2 A   | 0.48±0.06 B    | 0.67±0.10      |              |
| 2-Oxoglutarate                                                   | 0.80±0.57    |                | 1.61±1.1 A     | 0.03±0.02 B  |
| Lactate                                                          | 1.75±0.28    |                | 2.06±0.44 A    | 1.44±0.32 B  |
| Propionate                                                       | 0.13±0.09 A  | 0.062±0.03 B   | 0.16±0.08 A    | 0.02±0.01 B  |
| Isovalerate                                                      | <MDL         |                |                |              |
| Salicylic acid                                                   | 0.043±0.04 A | 0.0056±0.002 B | 0.016±0.006 B  | 0.032±0.04 A |
| Coumaric acid                                                    | 0.091±0.04 B | 0.13±0.05 A    | 0.16±0.04 A    | 0.06±0.04 B  |

| <b>Rhizosphere solution organic acids with interactions</b> |                |                 |                        |                 |
|-------------------------------------------------------------|----------------|-----------------|------------------------|-----------------|
|                                                             | No inoculation |                 | <i>PcO6</i> inoculated |                 |
| µg per plant                                                | Water (n = 9)  | Drought (n = 9) | Water (n = 9)          | Drought (n = 9) |
| Acetate                                                     | 2.25±0.48 A    | 2.34±1.89 A     | 0.126±0.06 B           | 0.39±0.31 B     |
| Formate                                                     | 3.75±0.87 A    | 2.20±0.33 B     | 0.071±0.03 D           | 0.18±0.05 C     |
| Malate                                                      | 8.12±2.8 A     | 10.0±3.4 A      | 0.081±0.027 C          | 0.68±0.31 B     |
| Citrate                                                     | 6.92±3.48 A    | 7.09±3.68 A     | 0.101±0.05 B           | 0.35±0.22 B     |

|                                                         |               |               |                 |                |
|---------------------------------------------------------|---------------|---------------|-----------------|----------------|
| Pyruvate                                                | 6.04±4.1 A    | 0.78±0.34 A   | 0.039±0.018 C   | 0.23±0.07 B    |
| Valerate                                                | 0.22±0.06 A   | 0.14±0.03 AB  | 0.086±0.02 B    | 0.102±0.03 B   |
| Butyrate                                                | 0.04±0.03 BC  | 0.02±0.02 C   | 0.74±0.61 B     | 21.7±10.1 A    |
| Rhizosphere solution amino acids with main effects only |               |               |                 |                |
| µg per plant                                            | Water         | Drought       | No <i>PcO</i> 6 | <i>PcO</i> 6   |
| Asparagine                                              | 0.021±0.008   |               | 0.031±0.0121 A  | 0.0096±0.004 B |
| Aspartate                                               | 2.49±0.66     |               |                 |                |
| Arginine                                                | 0.026±0.005 A | 0.022±0.004 B | 0.027±0.004 A   | 0.022±0.006 B  |
| Phenylalanine                                           | 0.22 ± 0.14 B | 0.38 ± 0.18 A | 0.55 ± 0.14 A   | 0.036 ± 0.02 B |
| Methionine                                              | 0.047±0.01    |               |                 |                |
| Proline                                                 | 0.38±0.15     |               | 0.59±0.23 A     | 0.18±0.14 B    |
| Serine                                                  | 0.58±0.16     |               | 0.81±0.29 A     | 0.36±0.10 B    |
| Alanine                                                 | 0.22 ± 0.13   |               | 0.37 ±0.24 A    | 0.067±0.05 B   |
| Cystine                                                 | 0.067±0.021   |               | 0.096±0.035 A   | 0.039±0.017 B  |
| Tryptophan                                              | 0.13±0.07 A   | 0.072±0.03 B  | 0.18±0.06 A     | 0.02±0.005 B   |
| Cysteine                                                | 0.031 ±0.016  |               | 0.054±0.029     | 0.007±0.002    |
| Histidine                                               | <MDL          |               |                 |                |
| Lysine                                                  | 0.016±0.005 B | 0.047±0.018 A | 0.032±0.012     |                |
| DMA                                                     | 0.78±0.21     |               |                 |                |

|                                                           |                |                 |                         |                 |
|-----------------------------------------------------------|----------------|-----------------|-------------------------|-----------------|
| <b>Rhizosphere solution amino acids with interactions</b> |                |                 |                         |                 |
|                                                           | No inoculation |                 | <i>PcO6</i> inoculation |                 |
| µg per plant                                              | Water (n = 9)  | Drought (n = 9) | Water (n = 9)           | Drought (n = 9) |
| Betaine                                                   | 0.88±0.20 AB   | 1.33±0.40 A     | 0.039±0.021 C           | 0.61±0.28 B     |
| Glutamate                                                 | 1.21±0.55 A    | 1.20±0.51 A     | 0.027±0.009 B           | 0.73±0.28 A     |
| Isoleucine                                                | 0.28±0.17 A    | 0.50±0.24 A     | 0.019±0.005 B           | 0.11±0.031 B    |
| Leucine                                                   | 0.41±0.22 AB   | 0.74±0.32 A     | 0.016±0.007 C           | 0.15±0.07 B     |
| Tyrosine                                                  | 0.32±0.13 A    | 0.44±0.10 A     | 0.019±0.006 C           | 0.084±0.042 B   |
| Threonine                                                 | 0.50±0.26 A    | 0.72±0.28 A     | 0.024±0.015 C           | 0.16±0.10 B     |
| Valine                                                    | 0.34±0.18 A    | 0.66±0.36 A     | 0.033±0.011 B           | 0.22±0.07 A     |

The values shown are the averages with ± 95% confidence intervals for the specific organic acids and amino acids detected in the rhizosphere solution, µg per plant. Different letters are statistically different by Tukey HSD tests. < MDL is less than the method detection limit.

**Supplemental Table S5.** Representation of growth of *PcO6* with designated substrates as sole carbon sources as determined at stationary - phase in Biolog plates. The size of the bar indicates relative growth of the cells in liquid shake culture as determined by chromogen accumulation dependent on active pseudomonad metabolism. Blue bars show growth with sugars and organic acids. Green bars show growth on L amino acids and metabolites.

|                  |                                                                                     |     |                   |                                                                                        |
|------------------|-------------------------------------------------------------------------------------|-----|-------------------|----------------------------------------------------------------------------------------|
|                  |                                                                                     |     |                   |                                                                                        |
| <b>trehalose</b> |    | 71  | <b>aspartate</b>  |  85   |
| <b>sucrose</b>   |    | 54  | <b>asparagine</b> |  88   |
| <b>glucose</b>   |    | 95  | <b>glutamate</b>  |  72   |
| <b>fructose</b>  |    | 7   | <b>glutamine</b>  |  128  |
| <b>gluconate</b> |    | 63  | <b>alanine</b>    |  150  |
| <b>lactate</b>   |    | 241 | <b>serine</b>     |  156  |
| <b>formate</b>   |    | 202 | <b>glycine</b>    |  65   |
| <b>butyrate</b>  |    | 80  | <b>valine</b>     |  113  |
| <b>GABA</b>      |    | 127 | <b>arginine</b>   |  71   |
| <b>pyruvate</b>  |   | 22  | <b>isoleucine</b> |  17  |
| <b>citrate</b>   |  | 100 | <b>putrescine</b> |  70 |
| <b>malate</b>    |  | 83  | <b>proline</b>    |  38 |

**Supplemental Tables S6.** Results of geochemical modeling for the complexes predicted to be present for Zn, Fe and Cu in the rhizosphere solutions.

The data shown in Supplemental Tables S6A were used to prepare Fig. 5 in the text of the paper for predicted complexation by % determined by geochemical modeling. Plants were grown with normal watering (W) or with drought (D) with (I) or without inoculation. The data in Table S6B set show more details of the predicted complexes by % for the metals when present together in the rhizosphere solution.

Table S6A

|    |               | %,W | %, D | %, IW | %, I D |
|----|---------------|-----|------|-------|--------|
| Zn | ions          | 90  | 91   | 97    | 96     |
|    | organic acids | 8   | 6    | 0.1   | 0.2    |
|    |               |     |      |       |        |
| Fe | gluconates    | 99  | 98   | 97    | 98     |
|    | DMA           | 1   | 2    | 2     | 2      |
|    |               |     |      |       |        |
| Cu | gluconate     | 27  | 9    | 13    | 11     |
|    | DMA           | 14  | 26   | 64    | 43     |
|    | citrate       | 19  | 15   | 2     | 2      |
|    | amino acids   | 33  | 40   | 8     | 33     |
|    | ions          | 3   | 7    | 7     | 5      |
|    | carbonate     | 1   | 1    | 2     | 1      |

Table S6B

|                    | %, W   | %, D   | %, I W | %, I D |
|--------------------|--------|--------|--------|--------|
| Zn+2               | 88.674 | 89.763 | 95.196 | 94.53  |
| ZnOH+              | 1.254  | 1.217  | 1.374  | 1.301  |
| Zn-Citrate-        | 3.301  | 2.864  | 0.086  | 0.17   |
| Zn-Malate (aq)     | 2.342  | 2.547  | 0.027  | 0.194  |
| ZnGluconate        | 1.4    | 0      | 0      | 0      |
|                    |        |        |        |        |
| CaFeGluconate(OH)3 | 82.335 | 81.521 | 80.727 | 81.297 |
| CaFeGluconate(OH)4 | 16.852 | 16.392 | 16.64  | 16.44  |
| Fe-DMA-OH          | 0.573  | 1.907  | 2.373  | 2.065  |
|                    |        |        |        |        |
| Cu2Gluconate2(OH)3 | 27     | 8      | 13     | 11     |
| Cu-Citrate-        | 19.327 | 14.75  | 1.587  | 1.741  |
| Cu-Glutamate (aq)  | 18     | 19     | 1.655  | 22     |
| Cu-DMA             | 14.441 | 25.679 | 63.279 | 43.374 |
| Cu-2Ser            | 6.705  | 11.306 | 4.413  | 6.434  |
| Cu-Phe+            | 3.218  | 7      | 0.345  | 1.033  |
| Cu-Val+            | 3.178  | 8      | 0.941  | 4.156  |
| Cu+2               | 1.677  | 1.943  | 4.873  | 3.67   |
| Cu-Malate (aq)     | 1.239  | 1.45   | 0.04   | 0.202  |
| Cu-Oxalate (aq)    | 1.131  | 0.383  | 5      | 1.459  |
| CuOH+              | 0.774  | 0.856  | 2.306  | 1.644  |
| CuCO3 (aq)         | 0.675  | 0.734  | 2.026  | 1.417  |



**Supplemental Table S7.** Essential metal detection in washed and muffle- furnace treated sand.

|                                                                      | Fe<br>mg /kg dry sand | Zn<br>mg /kg dry sand | Cu<br>mg /kg dry sand |
|----------------------------------------------------------------------|-----------------------|-----------------------|-----------------------|
| Water soluble (2:1 DI water sand)                                    | 1.4                   | 0.01                  | 0.01                  |
| Nitric acid digestion (EPA method 3050)                              | 347                   | 2.2                   | 0.4                   |
| DTPA-ABC extraction                                                  | 2.8                   | 0.1                   | 0.3                   |
| Nutrient level considered low for plant fertility by DTPA extraction | <3                    | <1                    | <0.2                  |

White high purity silica sand (UNIMIN Corp., ID, US), with particle size such that 75 % was retained on a 40-mesh sieve, was washed by deionized water (DI) three times, before heating overnight in a 550 °C muffle furnace to remove organic matter. The muffled sand was washed in distilled deionized water, and oven dried at 150 °C before analyses for metal content and being used for plant growth. The metal contents for Cu, Fe and Zn in the prepared sand were lower than the minimal levels proposed for plant fertility according to James and Topper (2010).

**Supplemental Table S8A-E.** Details of metabolite analyses

The QQQ method uses the Intrada Amino Acid normal phase chromatographic column to separate and determine amino acids. A second C18 column is used to separate and determine phenolic acids and DMA. Instrument operation conditions are shown in Table 8A:

**Table S8A.** HPLC and MS conditions.

| <b>HPLC Conditions</b>    |                                  |                                                           |
|---------------------------|----------------------------------|-----------------------------------------------------------|
| Column                    | Intrada                          | C18                                                       |
|                           | 2.1 × 50 mm, 3 μm,               | 2.1 × 50 mm, 1.8 μm,                                      |
| Mobile phase A            | 100 mM ammonium formate in water | 20 mM ammonium formate in water at pH = 3                 |
| Mobile phase B            | ACN with 0.1 FA                  | 20 mM aqueous ammonium formate at pH = 3 in 9:1 ACN/water |
| Flow rate                 | 0.60 mL/min                      | 0.20 mL/min                                               |
| Column temperature        | 35 °C                            | 35 °C                                                     |
| Injection volume          | 2 μL                             | 2 μL                                                      |
| Total run time            | 12 minutes                       | 10 minutes                                                |
| Gradient<br>Time (min) %B | 0 85                             | 0 2                                                       |
|                           | 3 85                             | 1 2                                                       |
|                           | 10 0                             | 8 50                                                      |
|                           | 12 85                            | 10 2                                                      |

| <b>MS Conditions</b>   |                                 |
|------------------------|---------------------------------|
| Ionization mode        | ESI Positive/Negative           |
| Gas temperature        | 330 °C                          |
| Gas flow               | 13.0 L/min                      |
| Nebulizer              | 35 psi                          |
| Sheath gas temperature | 390 °C                          |
| Sheath gas flow        | 17 L/min                        |
| Capillary voltage      | Positive 1,500 V Negative 3000V |
| Nozzle voltage         | Positive 300 V Negative 400V    |

Data relevant to quantification are provided in Table S8B through S8E.

Table S8B the range of concentrations of authentic chemicals used in the analyses.

Table S8C MS parameters and retention times

Table S8D Standard curve results

Table S8E Minimum detection limits

**Table S8B.** Concentration ranges utilized. (ISTD = internal standard)

| Group       | Compound        | Level1 | Level2 | Level3 | Level4 | Level5 | Level6 | Level7 | Unit |
|-------------|-----------------|--------|--------|--------|--------|--------|--------|--------|------|
| Amino Acids | L-Phenylalanine | 0.1    | 0.2    | 0.5    | 1      | 2      | 5      | 10     | µM/L |
| Amino Acids | L-Tryptophan    | 10     | 20     | 50     | 100    | 200    | 500    | 1000   | µg/L |
| Amino Acids | L-Isoleucine    | 0.1    | 0.2    | 0.5    | 1      | 2      | 5      | 10     | µM/L |
| Amino Acids | L-Leucine       | 0.1    | 0.2    | 0.5    | 1      | 2      | 5      | 10     | µM/L |
| Amino Acids | L-Methionine    | 0.1    | 0.2    | 0.5    | 1      | 2      | 5      | 10     | µM/L |
| Amino Acids | L-Asparagine    | 10     | 20     | 50     | 100    | 200    | 500    | 1000   | µg/L |
| Amino Acids | L-Tyrosine      | 0.1    | 0.2    | 0.5    | 1      | 2      | 5      | 10     | µM/L |
| Amino Acids | L-Proline       | 0.1    | 0.2    | 0.5    | 1      | 2      | 5      | 10     | µM/L |
| Amino Acids | L-Valine        | 0.1    | 0.2    | 0.5    | 1      | 2      | 5      | 10     | µM/L |
| Amino Acids | L-Alanine       | 0.1    | 0.2    | 0.5    | 1      | 2      | 5      | 10     | µM/L |
| Amino Acids | L-Threonine     | 0.1    | 0.2    | 0.5    | 1      | 2      | 5      | 10     | µM/L |
| Amino Acids | Glycine         | 0.1    | 0.2    | 0.5    | 1      | 2      | 5      | 10     | µM/L |
| Amino Acids | L-Glutamic acid | 0.1    | 0.2    | 0.5    | 1      | 2      | 5      | 10     | µM/L |
| Amino Acids | L-Aspartic acid | 0.1    | 0.2    | 0.5    | 1      | 2      | 5      | 10     | µM/L |
| Amino Acids | L-Serine        | 0.1    | 0.2    | 0.5    | 1      | 2      | 5      | 10     | µM/L |
| Amino Acids | L-Cystine       | 0.05   | 0.1    | 0.25   | 0.5    | 1      | 2.5    | 5      | µM/L |
| Amino Acids | L-Histidine     | 0.1    | 0.2    | 0.5    | 1      | 2      | 5      | 10     | µM/L |
| Amino Acids | L-Lysine        | 0.1    | 0.2    | 0.5    | 1      | 2      | 5      | 10     | µM/L |
| Amino Acids | L-Arginine      | 0.1    | 0.2    | 0.5    | 1      | 2      | 5      | 10     | µM/L |
| Amino Acids | L-Cysteine      | 10     | 20     | 50     | 100    | 200    | 500    | 1000   | µg/L |
| Other       | Betaine         | 10     | 20     | 50     | 100    | 200    | 500    | 1000   | µg/L |
| Siderophore | DMA             | 0.05   | 0.1    | 0.25   | 0.5    | 1      | 2.5    | 5      | µM/L |
| Other       | Syringic acid   | 10     | 20     | 50     | 100    | 200    | 500    | 1000   | µg/L |
| Other       | Coumaric acid   | 10     | 20     | 50     | 100    | 200    | 500    | 1000   | µg/L |
| Other       | Jasmonic Acid   | 10     | 20     | 50     | 100    | 200    | 500    | 1000   | µg/L |
| Other       | Abscisic Acid   | 10     | 20     | 50     | 100    | 200    | 500    | 1000   | µg/L |
| Other       | Ferulic acid    | 10     | 20     | 50     | 100    | 200    | 500    | 1000   | µg/L |
| Other       | Vanillic Acid   | 10     | 20     | 50     | 100    | 200    | 500    | 1000   | µg/L |
| Other       | Salicylic acid  | 10     | 20     | 50     | 100    | 200    | 500    | 1000   | µg/L |
| Other       | Caffeic acid    | 10     | 20     | 50     | 100    | 200    | 500    | 1000   | µg/L |
| Other       | Nicotinic acid  | 10     | 20     | 50     | 100    | 200    | 500    | 1000   | µg/L |
| Other       | Gallic acid     | 10     | 20     | 50     | 100    | 200    | 500    | 1000   | µg/L |
| ISTD        | IS-Ala          | 1      | 1      | 1      | 1      | 1      | 1      | 1      | µM/L |
| ISTD        | IS-Arg          | 1      | 1      | 1      | 1      | 1      | 1      | 1      | µM/L |
| ISTD        | IS-Asn          | 1      | 1      | 1      | 1      | 1      | 1      | 1      | µM/L |
| ISTD        | IS-Asp          | 1      | 1      | 1      | 1      | 1      | 1      | 1      | µM/L |

| Group         | Compound       | Level1 | Level2 | Level3 | Level4 | Level5 | Level6 | Level7 | Unit |
|---------------|----------------|--------|--------|--------|--------|--------|--------|--------|------|
| ISTD          | IS-Cys         | 1      | 1      | 1      | 1      | 1      | 1      | 1      | µM/L |
| ISTD          | IS-Gln         | 1      | 1      | 1      | 1      | 1      | 1      | 1      | µM/L |
| ISTD          | IS-Glu         | 1      | 1      | 1      | 1      | 1      | 1      | 1      | µM/L |
| ISTD          | IS-Gly         | 1      | 1      | 1      | 1      | 1      | 1      | 1      | µM/L |
| ISTD          | IS-His         | 1      | 1      | 1      | 1      | 1      | 1      | 1      | µM/L |
| ISTD          | IS-Ile         | 1      | 1      | 1      | 1      | 1      | 1      | 1      | µM/L |
| ISTD          | IS-Leu         | 1      | 1      | 1      | 1      | 1      | 1      | 1      | µM/L |
| ISTD          | IS-Lys         | 1      | 1      | 1      | 1      | 1      | 1      | 1      | µM/L |
| ISTD          | IS-Met         | 1      | 1      | 1      | 1      | 1      | 1      | 1      | µM/L |
| ISTD          | IS-Phe         | 1      | 1      | 1      | 1      | 1      | 1      | 1      | µM/L |
| ISTD          | IS-Pro         | 1      | 1      | 1      | 1      | 1      | 1      | 1      | µM/L |
| ISTD          | IS-Ser         | 1      | 1      | 1      | 1      | 1      | 1      | 1      | µM/L |
| ISTD          | IS-Thr         | 1      | 1      | 1      | 1      | 1      | 1      | 1      | µM/L |
| ISTD          | IS-Trp         | 1      | 1      | 1      | 1      | 1      | 1      | 1      | µM/L |
| ISTD          | IS-Tyr         | 1      | 1      | 1      | 1      | 1      | 1      | 1      | µM/L |
| ISTD          | IS-Val         | 1      | 1      | 1      | 1      | 1      | 1      | 1      | µM/L |
| Organic acids | Gluconate      | 0.5    | 1      | 5      | 10     | 15     | 20     | N/A    | mg/L |
| Organic acids | Acetate        | 0.5    | 1      | 5      | 10     | 15     | 20     | N/A    | mg/L |
| Organic acids | Formate        | 0.5    | 1      | 5      | 10     | 15     | 20     | N/A    | mg/L |
| Organic acids | Malate         | 0.5    | 1      | 5      | 10     | 15     | 20     | N/A    | mg/L |
| Organic acids | Citrate        | 0.5    | 1      | 5      | 10     | 15     | 20     | N/A    | mg/L |
| Organic acids | Lactate        | 0.5    | 1      | 5      | 10     | 15     | 20     | N/A    | mg/L |
| Organic acids | Propionate     | 0.5    | 1      | 5      | 10     | 15     | 20     | N/A    | mg/L |
| Organic acids | Butyrate       | 0.5    | 1      | 5      | 10     | 15     | 20     | N/A    | mg/L |
| Organic acids | Oxalate        | 0.5    | 1      | 5      | 10     | 15     | 20     | N/A    | mg/L |
| Organic acids | 2-Oxoglutarate | 0.5    | 1      | 5      | 10     | 15     | 20     | N/A    | mg/L |
| Organic acids | Valerate       | 0.5    | 1      | 5      | 10     | 15     | 20     | N/A    | mg/L |
| Organic acids | Pyruvate       | 0.5    | 1      | 5      | 10     | 15     | 20     | N/A    | mg/L |

**Table S8C.** MS parameters and RT (in minutes)

| Group       | Compound        | RT    | Quant Transition | Qual Transition | ISTD Name | ISTD Transition | ISTD RT | Column     |
|-------------|-----------------|-------|------------------|-----------------|-----------|-----------------|---------|------------|
| Amino Acids | L-Phenylalanine | 2.398 | 166.1 -> 120.1   | 166.1 -> 103.0  | IS-Phe    | 176.1 -> 129.2  | 2.406   | Intrada AA |
| Amino Acids | L-Tryptophan    | 2.553 | 205.1 -> 188.0   | 205.1 -> 146.0  | IS-Trp    | 218.1 -> 156.2  | 2.545   | Intrada AA |
| Amino Acids | L-Isoleucine    | 2.676 | 132.1 -> 86.1    | 132.1 -> 44.2   | IS-Ile    | 139.1 -> 74.1   | 2.935   | Intrada AA |
| Amino Acids | L-Leucine       | 2.911 | 132.1 -> 30.2    | 132.1 -> 44.2   | IS-Leu    | 139.1 -> 46.2   | 2.676   | Intrada AA |
| Amino Acids | L-Methionine    | 3.144 | 150.1 -> 104.0   | 150.1 -> 56.1   | IS-Met    | 156.1 -> 109.1  | 3.143   | Intrada AA |
| Amino Acids | L-Asparagine    | 3.151 | 133.1 -> 87.1    | 133.1 -> 74.0   | IS-Asn    | 139.1 -> 77.1   | 3.151   | Intrada AA |
| Amino Acids | L-Tyrosine      | 3.407 | 182.1 -> 136.1   | 182.1 -> 91.1   | IS-Thr    | 125.1 -> 78.0   | 4.714   | Intrada AA |
| Amino Acids | L-Proline       | 3.464 | 116.1 -> 70.1    | 116.1 -> 43.2   | IS-Pro    | 122.0 -> 75.2   | 3.455   | Intrada AA |
| Amino Acids | L-Valine        | 3.619 | 118.1 -> 72.1    | 118.1 -> 55.1   | IS-Val    | 124.0 -> 77     | 3.619   | Intrada AA |
| Amino Acids | L-Alanine       | 4.645 | 90.1 -> 44.2     | 90.1 -> 45.3    | IS-Ala    | 93.8 -> 47.2    | 4.645   | Intrada AA |
| Amino Acids | L-Threonine     | 4.707 | 120.1 -> 74.1    | 120.1 -> 56.1   | IS-Thr    | 125.1 -> 78.0   | 4.714   | Intrada AA |
| Amino Acids | Glycine         | 4.826 | 76.0 -> 43.7     | 76.0 -> 30.3    | IS-Gly    | 78.8 -> 78.8    | 4.826   | Intrada AA |
| Amino Acids | L-Glutamic acid | 4.895 | 148.1 -> 84.1    | 146.0 -> 128.0  | IS-Glu    | 154 -> 89       | 4.895   | Intrada AA |
| Amino Acids | L-Aspartic acid | 5.006 | 134.0 -> 88.1    | 134.0 -> 74.0   | IS-Asp    | 139.1 -> 77.1   | 5.068   | Intrada AA |
| Amino Acids | L-Serine        | 5.014 | 106.1 -> 42.2    | 106.1 -> 60.0   | IS-Ser    | 109.9 -> 63.1   | 5.03    | Intrada AA |
| Amino Acids | L-Cystine       | 5.967 | 122.0 -> 59.1    | 122.0 -> 76.0   | IS-Thr    | 125.1 -> 78.0   | 4.714   | Intrada AA |
| Amino Acids | L-Histidine     | 7.812 | 156.1 -> 110.1   | 156.1 -> 83.1   | IS-His    | 165.1 -> 118.0  | 7.812   | Intrada AA |
| Amino Acids | L-Lysine        | 8.363 | 147.1 -> 84.1    | 147.1 -> 130.1  | IS-Lys    | 155.1 -> 90.0   | 8.368   | Intrada AA |
| Amino Acids | L-Arginine      | 8.906 | 175.1 -> 70.1    | 175.1 -> 60.1   | IS-Arg    | 185.1 -> 75.1   | 8.911   | Intrada AA |
| Amino Acids | L-Cysteine      | 4.1   | 122 -> 75        | 122 -> 59.1     | IS-Thr    | 125.1 -> 78.0   | 4.714   | Intrada AA |
| Amino Acids | Glutamine       | 5.2   | 147.1 -> 130     | 147.1 -> 84     | IS-Glu    | 154 -> 89       | 4.895   | Intrada AA |
| Other       | Betaine         | 2.51  | 118.1 -> 58.0    | 257.1 -> 95.0   | IS-Phe    | 176.1 -> 129.2  | 2.406   | Intrada AA |
| Siderophore | DMA             | 1.1   | 305.1 -> 186.0   | 305.1 -> 287.0  | IS-Trp    | 125.1 -> 78.0   | 4.28    | C18        |
| Other       | Syringic acid   | 0.9   | 197.0 -> 151.0   | 197.0 -> 182.0  | IS-Phe    | 176.1 -> 129.2  | 2.406   | Intrada AA |
| Other       | Coumaric acid   | 1.332 | 165.0 -> 147.0   | 165.0 -> 119.0  | IS-Trp    | 156.1 -> 109.1  | 4.28    | C18        |
| Other       | Jasmonic Acid   | 6.855 | 209.1 -> 59.0    | 209.1 -> 165.1  | IS-Phe    | 176.1 -> 129.2  | 2.882   | C18        |
| Other       | Abscisic Acid   | 6.277 | 265.1 -> 247.1   | 265.1 -> 187.1  | IS-Phe    | 176.1 -> 129.2  | 2.882   | C18        |
| Other       | Ferulic acid    | 0.5   | 193.0 -> 178.0   | 193.0 -> 134.0  | IS-Phe    | 176.1 -> 129.2  | 2.406   | Intrada AA |
| Other       | Vanillic Acid   | 4.86  | 166.9 -> 108.0   | 166.9 -> 137.0  | IS-Phe    | 176.1 -> 129.2  | 2.882   | C18        |
| Other       | Salicylic acid  | 1.1   | 137.0 -> 93.1    | 137.0 -> 65.2   | IS-Phe    | 176.1 -> 129.2  | 2.406   | Intrada AA |
| Other       | Caffeic acid    | 6.831 | 178.9 -> 135.0   | 178.9 -> 89.0   | IS-Phe    | 176.1 -> 129.2  | 2.882   | C18        |
| Other       | Nicotinic acid  | 1.05  | 124.0 -> 80.0    | 122.0 -> 51.2   | IS-Phe    | 176.1 -> 129.2  | 2.882   | C18        |
| Other       | Gallic acid     | 1.1   | 168.9 -> 124.9   | 168.9 -> 79.1   | IS-Phe    | 176.1 -> 129.2  | 2.406   | Intrada AA |
| Other       | Trehalose       | 2     | 365.0 -> 203.0   | 341.0 -> 59.0   | IS-Phe    | 176.1 -> 129.2  | 2.406   | Intrada AA |

| Group         | Compound       | RT     | Quant Transition | Qual Transition | ISTD Name | ISTD Transition | ISTD RT | Column              |
|---------------|----------------|--------|------------------|-----------------|-----------|-----------------|---------|---------------------|
| Other         | Spermine       | 4.5    | 203.2 -> 209.1   | 203.2 -> 112.1  | IS-Thr    | 125.1 -> 78.0   | 4.714   | Intrada AA          |
| Other         | Spermidine     | 4.5    | 146.2 -> 72.1    | 146.2 -> 129.1  | IS-Thr    | 125.1 -> 78.0   | 4.714   | Intrada AA          |
| Other         | Putrescine     | 0.703  | 89.0 -> 30.0     | 89.0 -> 72.0    | IS-Trp    | 125.1 -> 78.0   | 4.28    | C18                 |
| Organic acids | Gluconate      | 8.573  | N/A              | N/A             | N/A       | N/A             | N/A     | ThermoFisher AS11HC |
| Organic acids | Acetate        | 9.780  | N/A              | N/A             | N/A       | N/A             | N/A     | ThermoFisher AS11HC |
| Organic acids | Formate        | 12.110 | N/A              | N/A             | N/A       | N/A             | N/A     | ThermoFisher AS11HC |
| Organic acids | Malate         | 25.290 | N/A              | N/A             | N/A       | N/A             | N/A     | ThermoFisher AS11HC |
| Organic acids | Citrate        | 37.970 | N/A              | N/A             | N/A       | N/A             | N/A     | ThermoFisher AS11HC |
| Organic acids | Lactate        | 9.07   | N/A              | N/A             | N/A       | N/A             | N/A     | ThermoFisher AS11HC |
| Organic acids | Propionate     | 11.320 | N/A              | N/A             | N/A       | N/A             | N/A     | ThermoFisher AS11HC |
| Organic acids | Butyrate       | 12.673 | N/A              | N/A             | N/A       | N/A             | N/A     | ThermoFisher AS11HC |
| Organic acids | Oxalate        | 29.243 | N/A              | N/A             | N/A       | N/A             | N/A     | ThermoFisher AS11HC |
| Organic acids | 2-Oxoglutarate | 27.917 | N/A              | N/A             | N/A       | N/A             | N/A     | ThermoFisher AS11HC |
| Organic acids | Valerate       | 15.113 | N/A              | N/A             | N/A       | N/A             | N/A     | ThermoFisher AS11HC |
| Organic acids | Pyruvate       | 13.297 | N/A              | N/A             | N/A       | N/A             | N/A     | ThermoFisher AS11HC |

The correlation coefficient  $R^2$  of all reported compounds is not less than 0.99 as demonstrated by the data in Table S8D.

**Table S8D.** Standard curve results

| Group        | Compound        | Curve Fit | Curve Fit Formula                  | Curve Fit $R^2$ |
|--------------|-----------------|-----------|------------------------------------|-----------------|
| Amino Acids  | L-Phenylalanine | Linear    | $y = 9.011543 * x - 0.047623$      | 0.9998          |
| Amino Acids  | L-Tryptophan    | Linear    | $y = 11.842789 * x - 0.091137$     | 0.9992          |
| Amino Acids  | L-Isoleucine    | Linear    | $y = 54.567262 * x - 0.419924$     | 0.9992          |
| Amino Acids  | L-Leucine       | Linear    | $y = 5.362601 * x - 0.030544$      | 0.9974          |
| Amino Acids  | L-Methionine    | Linear    | $y = 20.001171 * x - 0.112620$     | 0.9989          |
| Amino Acids  | L-Asparagine    | Linear    | $y = 6.303982 * x + 0.060418$      | 0.9982          |
| Amino Acids  | L-Tyrosine      | Linear    | $y = 7.878483 * x - 0.112140$      | 0.9969          |
| Amino Acids  | L-Proline       | Linear    | $y = 4.798481 * x - 0.029112$      | 0.9996          |
| Amino Acids  | L-Valine        | Linear    | $y = 5.332735 * x - 0.039520$      | 0.9991          |
| Amino Acids  | L-Alanine       | Linear    | $y = 3.470595 * x - 0.024634$      | 0.9990          |
| Amino Acids  | L-Threonine     | Linear    | $y = 6.557110 * x + 0.032257$      | 0.9988          |
| Amino Acids  | Glycine         | Linear    | $y = 3.816395 * x - 0.096900$      | 0.9842          |
| Amino Acids  | L-Glutamic acid | Linear    | $y = 1.882982 * x + 0.006850$      | 0.9998          |
| Amino Acids  | L-Aspartic acid | Linear    | $y = 0.474376 * x + 0.009206$      | 0.9993          |
| Amino Acids  | L-Serine        | Linear    | $y = 2.162862 * x + 0.159566$      | 0.9985          |
| Amino Acids  | L-Cystine       | Linear    | $y = 3.667328 * x + 0.033396$      | 0.9990          |
| Amino Acids  | L-Histidine     | Linear    | $y = 29.175062 * x + 0.253324$     | 0.9960          |
| Amino Acids  | L-Lysine        | Linear    | $y = 5.958616 * x + 0.104629$      | 0.9980          |
| Amino Acids  | L-Arginine      | Linear    | $y = 1.227602 * x + 0.001103$      | 0.9991          |
| Amino Acids  | L-Cysteine      | Linear    |                                    |                 |
| Amino acids  | Glutamine       | Linear    | $y = 1.299854 * x - 0.012777$      | 0.9986          |
| Other        | Betaine         | Linear    | $y = 193.344141 * x - 1.014497$    | 0.9999          |
| Siderophores | DMA             | Linear    | $y = 0.048859 * x - 0.001887$      | 0.9940          |
| Other        | Syringic acid   | Linear    | $y = 0.119196 * x + 0.094255$      | 0.9401          |
| Other        | Coumaric acid   | Linear    | $y = 0.008448 * x - 1.559670E-004$ | 0.9930          |
| Other        | Jasmonic Acid   | Linear    | $y = 0.264706 * x - 0.008222$      | 0.9942          |
| Other        | Abscisic Acid   | Linear    | $y = 0.035792 * x - 6.597420E-004$ | 0.9923          |



| Group         | Compound       | Curve Fit | Curve Fit Formula                  | Curve Fit<br>R <sup>2</sup> |
|---------------|----------------|-----------|------------------------------------|-----------------------------|
| Other         | Ferulic acid   | Linear    | $y = 0.027037 * x - 1.510547E-005$ | 0.9972                      |
| Other         | Vanillic Acid  | Linear    | $y = 0.023836 * x - 4.167909E-004$ | 0.9974                      |
| Other         | Salicylic acid | Linear    | $y = 0.944205 * x + 0.013260$      | 0.9985                      |
| Other         | Caffeic acid   | Linear    | $y = 0.183273 * x - 0.001184$      | 0.9935                      |
| Other         | Nicotinic acid | Linear    | $y = 0.878263 * x - 0.021481$      | 0.9967                      |
| Other         | Gallic acid    | Linear    | $y = 0.140877 * x - 0.001663$      | 0.9972                      |
| Other         | Trehalose      | Linear    | $y = 15.020935 * x + 12.720002$    | 0.9772                      |
| Other         | Spermine       | Linear    | $y = 0.007128 * x + 0.001263$      | 0.9904                      |
| Other         | Spermidine     | Linear    | $y = 4.455273 * x - 0.155584$      | 0.9845                      |
| Other         | Putrescine     | Linear    | $y = 0.948373 * x + 0.021457$      | 0.9913                      |
| Organic acids | Gluconate      | Linear    | $Y = 0.0411 * x$                   | 0.999                       |
| Organic acids | Acetate        | Linear    | $Y = 0.1191 * x$                   | 0.999                       |
| Organic acids | Formate        | Linear    | $Y = 0.1865 * x$                   | 0.999                       |
| Organic acids | Malate         | Linear    | $Y = 0.0995 * x$                   | 0.999                       |
| Organic acids | Citrate        | Linear    | $Y = 0.0566 * x$                   | 0.999                       |
| Organic acids | Lactate        | Linear    | $Y = 0.0892 * x$                   | 0.999                       |
| Organic acids | Propionate     | Linear    | $Y = 0.0861 * x$                   | 0.999                       |
| Organic acids | Butyrate       | Linear    | $Y = 0.0773 * x$                   | 0.999                       |
| Organic acids | Oxalate        | Linear    | $Y = 0.3512 * x$                   | 0.999                       |
| Organic acids | 2-Oxoglutarate | Linear    | $Y = 0.0850 * x$                   | 0.999                       |
| Organic acids | Valerate       | Linear    | $Y = 0.0677 * x$                   | 0.999                       |
| Organic acids | Pyruvate       | Linear    | $Y = 0.0820 * x$                   | 0.999                       |

The minimum detection limit (MDL) or lowest detection limit is determined from seven injections of the lowest concentration and evaluated using the SW846 - evaluation method, 3 times the standard deviation.

**Table S8E.** Minimum detection limits

| Group       | Compound        | MDL<br>Avg<br>Conc. | LOD   | LOQ   | Noise   | S/N    | Unit |
|-------------|-----------------|---------------------|-------|-------|---------|--------|------|
| Amino Acids | L-Phenylalanine | 0.144               | 0.019 | 0.065 | 20.36   | 55.94  | μM/L |
| Amino Acids | L-Tryptophan    | 13.1                | 2     | 6.8   | 50.69   | 18.08  | μg/L |
| Amino Acids | L-Isoleucine    | 0.097               | 0.067 | 0.224 | 12.53   | 8.52   | μM/L |
| Amino Acids | L-Leucine       | 0.1                 | 0.025 | 0.084 | 13.36   | 2.36   | μM/L |
| Amino Acids | L-Methionine    | 0.138               | 0.039 | 0.131 | 8.65    | 21.72  | μM/L |
| Amino Acids | L-Asparagine    | 0.164               | 0.033 | 0.111 | 6.48    | ∞      | μM/L |
| Amino Acids | L-Tyrosine      | 0.071               | 0.021 | 0.069 | 17.81   | 20.73  | μM/L |
| Amino Acids | L-Proline       | 0.108               | 0.012 | 0.04  | 25.16   | ∞      | μM/L |
| Amino Acids | L-Valine        | 0.183               | 0.114 | 0.381 | 19.83   | 1.43   | μM/L |
| Amino Acids | L-Alanine       | 0.272               | 0.402 | 1.341 | 44.74   | 0.41   | μM/L |
| Amino Acids | L-Threonine     | 0.103               | 0.082 | 0.275 | 14.32   | 2.25   | μM/L |
| Amino Acids | Glycine         | 2.77                | 2.298 | 7.659 | 29.15   | 1.77   | μM/L |
| Amino Acids | L-Glutamic acid | 0.092               | 0.069 | 0.231 | 9.61    | 23.11  | μM/L |
| Amino Acids | L-Aspartic acid | 0.094               | 0.07  | 0.234 | 14.5    | 12.86  | μM/L |
| Amino Acids | L-Serine        | 1.211               | 2.796 | 9.318 | 29.37   | 0.97   | μM/L |
| Amino Acids | L-Cystine       | 0.07                | 0.089 | 0.295 | 0.3     | 34.92  | μM/L |
| Amino Acids | L-Histidine     | 0.136               | 0.023 | 0.076 | 21.46   | 218.91 | μM/L |
| Amino Acids | L-Lysine        | 0.115               | 0.078 | 0.261 | 4.9     | 10.49  | μM/L |
| Amino Acids | L-Arginine      | 0.126               | 0.012 | 0.039 | 19.74   | 241.67 | μM/L |
| Amino Acids | L-Cysteine      | 6.19                | 2.81  | 9.36  | 8.25    | 20.77  | μg/L |
| Amino Acids | Glutamine       | 10                  | 0.51  | 1.77  | -       | 59.2   | μg/L |
| Other       | Betaine         | 13.7                | 1.5   | 5     | 1000.69 | 43.88  | μg/L |
| Siderophore | DMA             | 0.076               | 0.048 | 0.161 | 0.3     | 378.8  | μM/L |
| Other       | Syringic acid   | 20.7                | 16.3  | 54.3  | 0.29    | 107.82 | μg/L |
| Other       | Coumaric acid   | 18                  | 12.7  | 42.3  | 21.6    | 4.2    | μg/L |
| Other       | Jasmonic Acid   | 15.7                | 3.3   | 10.9  | 0.06    | ∞      | μg/L |
| Other       | Abscisic Acid   | 32                  | 18.1  | 60.4  | 34.85   | 6.55   | μg/L |
| Other       | Ferulic acid    | 25.9                | 19.9  | 66.2  | 0.19    | ∞      | μg/L |
| Other       | Vanillic Acid   | 33.8                | 28.1  | 93.7  | 0.24    | 32.16  | μg/L |
| Other       | Salicylic acid  | 26.3                | 5.5   | 18.2  | 9.9     | ∞      | μg/L |
| Other       | Caffeic acid    | 18.7                | 6.3   | 20.9  | 4.9     | ∞      | μg/L |

| Group         | Compound       | MDL<br>Avg<br>Conc. | LOD  | LOQ  | Noise | S/N  | Unit |
|---------------|----------------|---------------------|------|------|-------|------|------|
| Other         | Nicotinic acid | 10.1                | 3.6  | 12.1 | 6.43  | ∞    | µg/L |
| Other         | Gallic acid    | 25                  | 22.8 | 75.9 | 7.53  | 6.45 | µg/L |
| Organic acids | Gluconate      | 0.03                | N/A  | N/A  | N/A   | N/A  | mg/L |
| Organic acids | Acetate        | 0.05                | N/A  | N/A  | N/A   | N/A  | mg/L |
| Organic acids | Formate        | 0.01                | N/A  | N/A  | N/A   | N/A  | mg/L |
| Organic acids | Malate         | 0.09                | N/A  | N/A  | N/A   | N/A  | mg/L |
| Organic acids | Citrate        | 0.03                | N/A  | N/A  | N/A   | N/A  | mg/L |
| Organic acids | Lactate        | 0.09                | N/A  | N/A  | N/A   | N/A  | mg/L |
| Organic acids | Propionate     | 0.03                | N/A  | N/A  | N/A   | N/A  | mg/L |
| Organic acids | Butyrate       | 0.03                | N/A  | N/A  | N/A   | N/A  | mg/L |
| Organic acids | Oxalate        | 0.0                 | N/A  | N/A  | N/A   | N/A  | mg/L |
| Organic acids | 2-Oxoglutarate | 0.09                | N/A  | N/A  | N/A   | N/A  | mg/L |
| Organic acids | Valerate       | 0.02                | N/A  | N/A  | N/A   | N/A  | mg/L |
| Organic acids | Pyruvate       | 0.09                | N/A  | N/A  | N/A   | N/A  | mg/L |

**Supplemental Figure S1.** Microbial colony growth from root washes.

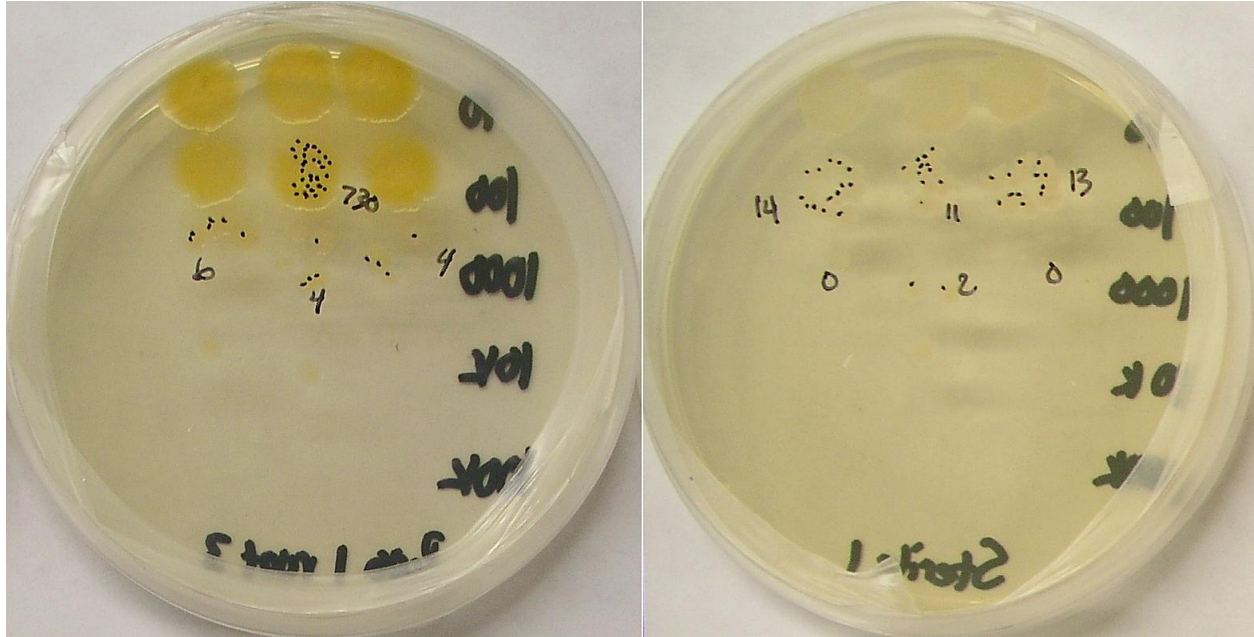

Images of typical agar plates showing (Left) colonies of *PcO6* as obtained from dilution plating of root washes from *PcO6* - inoculated plants, or (Right) the white colonies obtained from the root washes only of the noninoculated plants grown under drought stress. These plates are examples of those used to determine cfu/cm root at harvest as reported in the text.

**Supplemental Figure S2A,B.** These figures show the anticipated major metabolic pathways in wheat. They depict how low molecular weight organic acid metabolites relate to the TCA cycle (A) and to the synthesis of amino acid synthesis (B). Data are from: [93-94].

The blue arrows in Figure A show the shunt that replaces part of the TCA cycle yet allows levels of malate to be maintained.

Supplemental Figure S2A

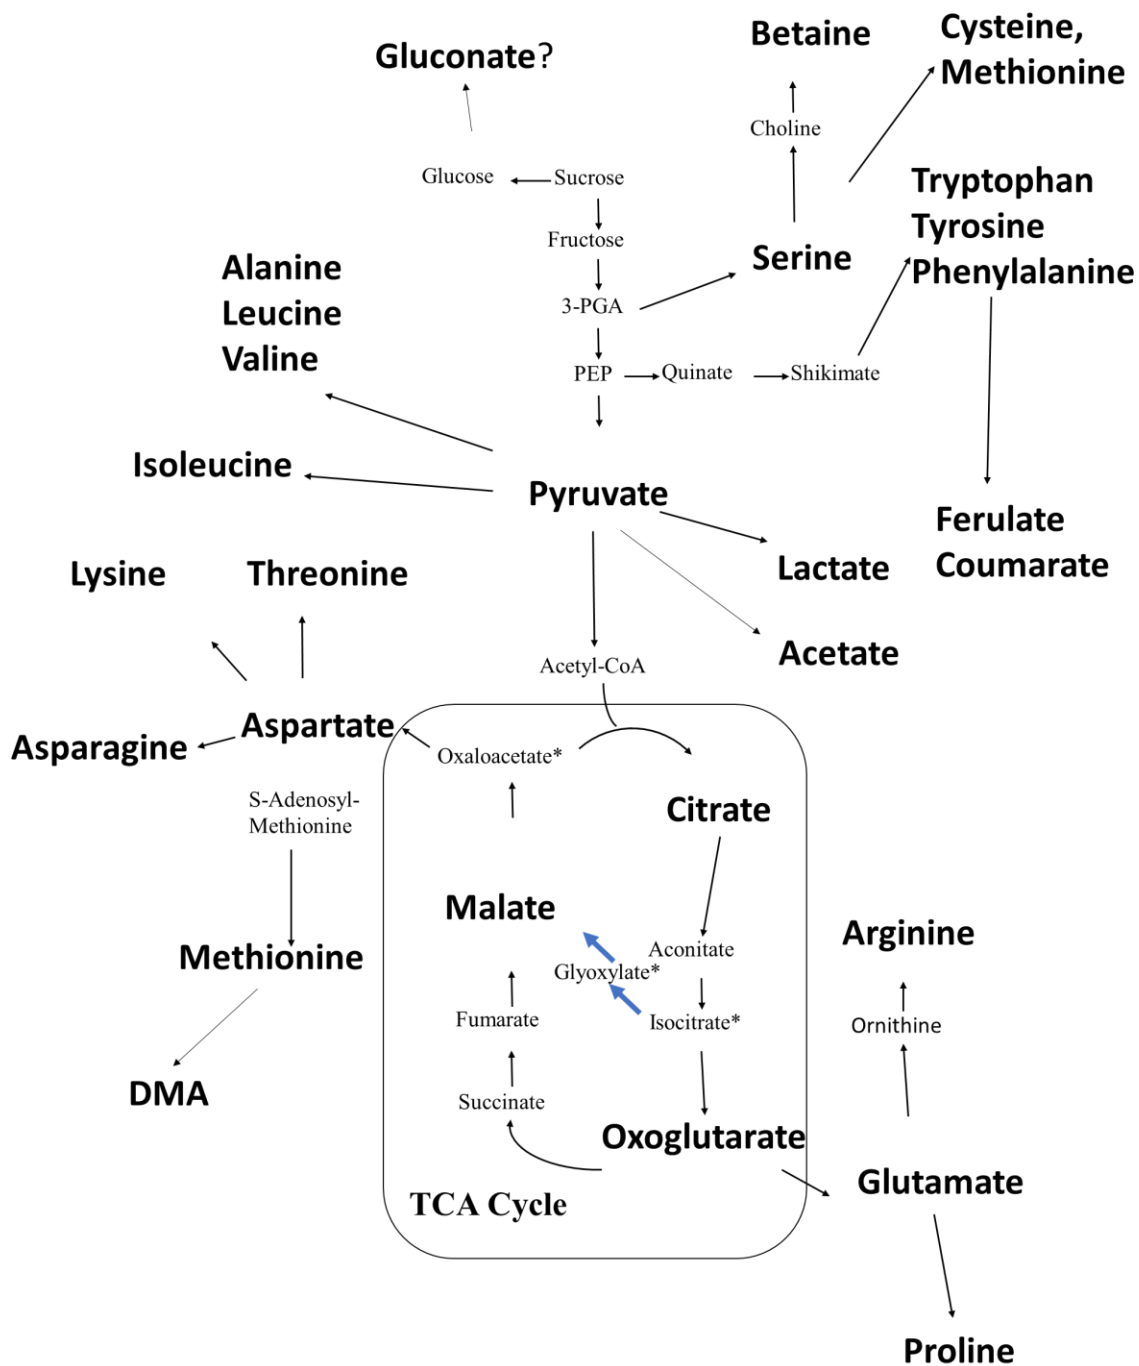

**Supplemental Figure S2B.**

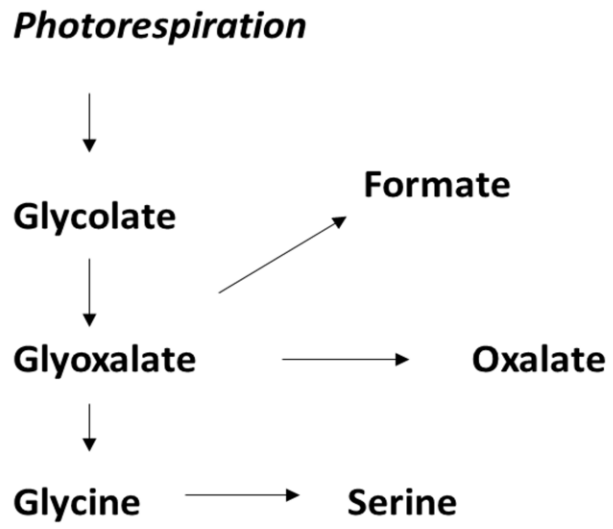

### Supplemental Figure S3. Quality control studies for shoot extracts.

Some metabolites in the shoot extracts did not pass quality control when tested. Thus, these metabolites although detected in some extracts were not discussed in the text of the paper. The metabolites were caffeic acid, GABA, glutamine, nicotinic acid and trehalose. Other metabolites had better consistency in recoveries but still sometimes fell outside 75-125% recovery. For these metabolites, laboratory control sample recovery and matrix extraction efficiencies are shown in Figure S4 with  $n = 4$  for laboratory control samples (analyte spiked into DI water and extracted) and  $n = 14$  for matrix extraction (analyte spiked into extracted solution just prior to analysis) efficiencies. Averages and standard deviations are shown. The beige shaded portion shows the zone of 75-125% recovery.

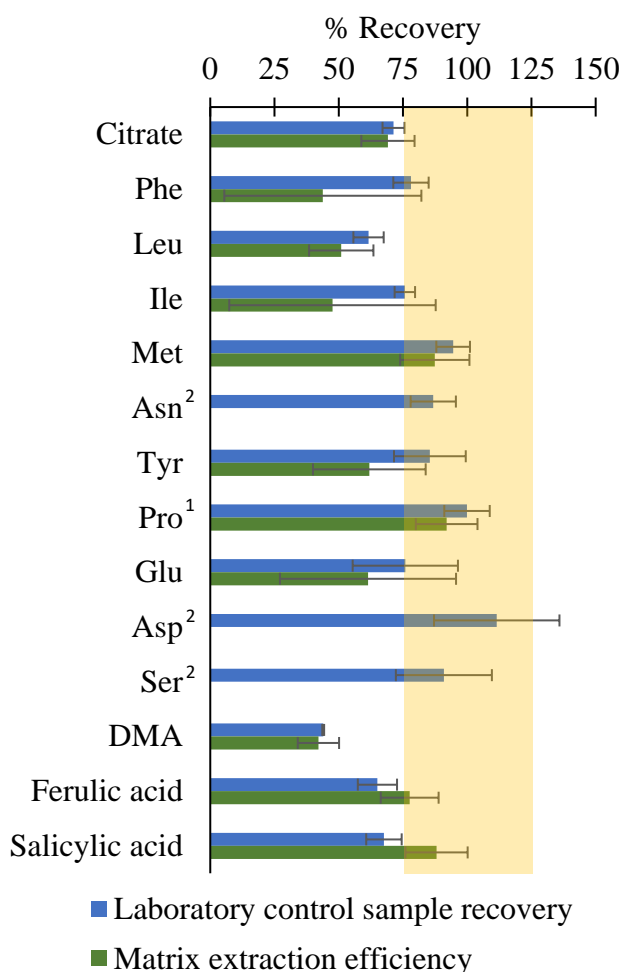

<sup>1</sup>For proline, only the matrix extraction efficiencies of the well-watered treatments ( $n = 6$ ) are shown; the matrix extraction efficiencies of the droughted treatments ( $n = 8$ ) were  $< 0\%$  due to the high background concentrations.

<sup>2</sup>For these compounds, matrix extraction efficiencies are not reported despite acceptable laboratory control sample recoveries; the matrix extraction efficiencies were  $< 0\%$  due to the high background concentrations.
